# Supplementary material for: Stigma and Discrimination on People Living with HIV (PLHIV): a Systematic Review
Source: Preprints.org preprint supplement (doi:10.20944/preprints202104.0212.v2), 2021-04-19
Supplement: Supplementary file 1 [file supplementary]

# Stigma and Discrimination on People Living with HIV (PLHIV): a Systematic Review

*by Khotibul Umam*

---

**Submission date:** 14-Apr-2021 12:02PM (UTC+0800)

**Submission ID:** 1558755036

**File name:** English.docx (72.22K)

**Word count:** 4101

**Character count:** 22867

**Khotibul Umam<sup>1</sup>, Moses Glorino Rumambo Pandin<sup>2</sup>**<sup>1</sup> Doctoral Nursing Students, Faculty of Nursing, Universitas Airlangga, Indonesia<sup>2</sup> Faculty of Cultural Sciences, Universitas Airlangga, Indonesia**ABSTRACT**

12

**Introduction:** Human Immunodeficiency Virus (HIV) is a global health problem that is almost recorded in every country. The long-term and long-term negative impacts of HIV cases are stigma and discrimination in people with HIV (PLHIV). The purpose of this study is to find out the stigma and discrimination felt by PLHIV.

**Method:** This study design of systematic review from 4 electronic databases namely Scopus ScienceDirect, Sage and ProQuest by using keywords tailored to Medical Subject Headings (MeSH) including "Stress", "covid", "nursing", "hospital". This study uses PICOS framework to prevent research bias and analysed using descriptive analysis.

**Results:** The results of the analysis of the article showed from 761 articles have been identified title, abstract and full-text so that recorded 15 articles that can be reviewed. The article consists of various designs, namely RCT, cross sectional and qualitative studies. Analysis shows that stigma and discrimination are social phenomena that manifest in several social areas.

**Conclusion:** Stigma and discrimination in people with HIV (PLHIV) is still common, stigma is carried out by the wider community to their own families. The family approach is necessary to improve well-being as well as improve the social community of the family.

**Keywords:** Stigma, discrimination, HIV/AIDS

**INTRODUCTION**

Nowadays HIV has become a major public health problem, globally almost all countries recorded as cases (1). People infected with HIV are often referred to as People Living with HIV (PLHIV) and often show a declining health condition (2). This decline in health is often associated with physical and psychological health conditions, such as poor medical care, adherence to antiretroviral drugs, stress due to lack of self-acceptance, stigma and discrimination from the family environment and society as well as other factors that aggravate the condition (3,4). In addition to the stigma and strict discrimination from the community, the health condition of people with HIV is decreasing with opportunistic infections that can

suppress the immunity of sufferers, resulting in a decrease in well-being and quality of life (5,6).

<sup>11</sup> In 2018, 37,968 people addressing HIV diagnosis in the United States and dependent regions (7). According to who, about 38 million people worldwide with HIV/AIDS in 2019, from the data of the number of cases, 36.2 million of them are adults and 1.8 million are children (< 15 years) (8). Data on deaths from HIV / AIDS is also growing, recorded since the start of the epidemic, an estimated 74.9 million people have been infected with HIV and 32 million people died from AIDS-related diseases. In 2018, a total of 770,000 people died from AIDS-related diseases. This number has decreased by more than 55% since a peak of 1.7 million in 2004 and 1.4 million in 2010 (9). The development of the number of cases was also followed by the increasing stigma and discrimination that people give to people with HIV.

<sup>3</sup> Stigma in particular regarding HIV has been cited as one of the most enduring barriers to ending the HIV problem in society (10). Stigma is a condition that becomes the main social measuring point of health that drives morbidity, death, and determines health inequality (11). The stigma received by HIV sufferers is characterized by various cognitive, emotional, and behavioural components and can be reflected both in the attitude given. Stigma that is often felt is associated with experience, including an enforced or experienced stigma that affects a particular trait, among individuals (12). HIV-related stigma has been linked to poor health behaviour. This stigma is directly related to the reduction of voluntary counselling and testing (VCT) and the disclosure of cases of infection (13). So it is expected that through the application of a combination of effective stigma mitigation interventions on a large scale requires transdisciplinary longitudinal (14). The impact of stigma experienced by patients with HIV/AIDS is very diverse, often found patients experience low self-esteem, stress or decreased mental health, especially if followed by other diseases such as disability or other opportunistic infections (15).

<sup>4</sup> Related to stigma and discrimination in people living with HIV / AIDS (PLHIV) has been conducted many studies (16) (17) (18), including the existence of self-stigma, stigma from the family to the community environment. However, it is still reported by various studies that there are still types and stigmas that have not been revealed as a whole in patients with HIV/AIDS. This systematic review aims to contribute to the knowledge of stigma by conducting an analysis of the type of stigma in HIV/AIDS, the impact of stigma and exploring whether and how the stigma framework occurs.

## METHOD

### Search Strategy

We use literature reviews using four credible electronic databases namely Scopus, ScienceDirect, PubMed and ProQuest. The four databases we conducted selection based on the field of science, namely with the categories of medical sciences, Social Sciences, and nursing sciences. To extend the search range of articles, we use the Boolean operator AND, OR in each database. Keyword search has been adjusted with Medical Subject Headings (MeSH) to search for articles in the 4 electronic databases namely the search terms are "stigma", "discrimination", "HIV/AIDS". Keyword search information can be seen in table 1.

Table 1. Keyword

| Stigma        | Discrimination               | HIV                          |
|---------------|------------------------------|------------------------------|
| OR            | OR                           | OR                           |
| Social Stigma | Psychological Discrimination | Human Immunodeficiency Virus |
|               |                              | OR                           |
|               |                              | HIV/AIDS                     |
|               |                              | OR                           |
|               |                              | HIV Infection Diagnosis      |

### Inclusion and exclusion criteria

To determine the quality of the study, the researchers set the study criteria through PICOS, namely participants, interventions, comparators, outcomes and study types, with the following explanations:

| Indicator    | Inclusion                                                                                      | Exclusion                                                                                                                  |
|--------------|------------------------------------------------------------------------------------------------|----------------------------------------------------------------------------------------------------------------------------|
| Participants | Research involving respondent with HIV or HIV/AIDS in the over-18 age group                    | Research that does not involve respondents with HIV or HIV/AIDS in the over-18 age group                                   |
| Intervention | Assessment of stigma or discrimination or both experienced by patients or people with HIV/AIDS | Research that does not work is related to stigma or discrimination or both experienced by patients or people with HIV/AIDS |
| Comparators  | Types of stigma experienced, efforts to address stigma and discrimination that exist           | None                                                                                                                       |

|                    |                                                                           |                                             |
|--------------------|---------------------------------------------------------------------------|---------------------------------------------|
| <i>Outcome</i>     | Quality of life, well-being, and health impacts on patients with HIV/AIDS | None                                        |
| <i>Study type</i>  | <i>RCT, cross-sectional, qualitative study</i>                            | <i>Systematic Review, Literature Review</i> |
| <i>Study Years</i> | 2015-2021                                                                 | Research before 2015                        |

## Review Method

The author makes article search steps by entering keywords that have been customized with Medical Subject Headings (MeSH) on each electronic database. Furthermore, researchers identify the suitability of the title, a title that implies stigma or discrimination or both in patients with HIV and then reviewed and then identified through abstracts that have been adjusted to the criteria of inclusion and exclusion that have been set before. After getting the number of articles that match the title and abstract, then read and analyse the overall of each article. Prior to that, researchers had identified duplicate articles from each database. After analysing the results of each full text researchers conducted a quality measurement of the study by calculating using JBI. In full can be seen in the following chart:

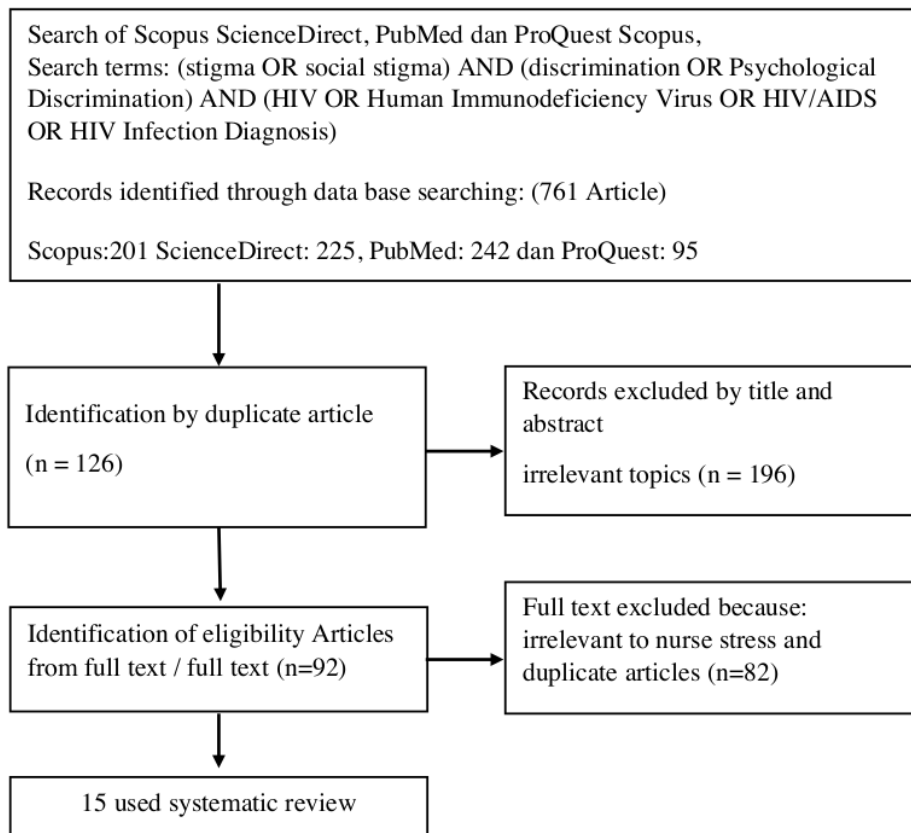

# Article

| Title | Method                                                                                                                                                                    | Results                                                                                                                                                                                                                                                                                           |
|-------|---------------------------------------------------------------------------------------------------------------------------------------------------------------------------|---------------------------------------------------------------------------------------------------------------------------------------------------------------------------------------------------------------------------------------------------------------------------------------------------|
| (19)  | D: RCT<br>S: 5662 PLHIV<br>V: HIV-related stigma<br>I: Berger HIV Stigma Scale<br>A: Ordinary least squares (OLS) regression                                              | Stigma is internalized in individuals due to the apparent suppression associated with an increase in the number of viruses. Efforts to address the HIV epidemic require an integral approach.                                                                                                     |
| (20)  | D: Cross sectional study<br>S: 86 HIV people<br>V: internalized stigma, and ART adherence<br>I: Stigma scale<br>A: qualitative analyse                                    | The handling of stigma cases as well as the importance of PLHIV is important in the handling of stigma cases, this is related to their health status.                                                                                                                                             |
| (21)  | D: RCT<br>S: 1153 surveys<br>V: stigma<br>I: Stigma Index 2.0 sections<br>A: Stata 15.0                                                                                   | The Stigma 2.0 Index is currently more relevant to the context of Hiv/AIDS epidemic and response. several policies must be addressed to support and provide direction plhiv involved in the service, comply with antiretroviral therapy treatment, suppress viral load, and manage healthy living |
| (22)  | D: Cross sectional study<br>S: 512 HIV<br>V: HIV, Stigma<br>I: cognitive performance, cognitive symptoms<br>A: Regression                                                 | The stigma that occurs in this HIV group has an influence on the decline of cognitive ability and well-being of his life, also affects his mental health condition.                                                                                                                               |
| (23)  | D: cross sectional study<br>S: 121 patients<br>V: Stigma, Motivation, Medication<br>I: motivation-behavioral skills (IMB), stigma<br>A: Spearman's rank correlation tests | Treatment results combined with strong self-motivation will minimize self-stigma in individuals with HIV                                                                                                                                                                                          |
| (24)  | D: cross sectional study<br>S: 203 participants<br>studies<br>V: stigma, adherence, depression<br>I: stigma, adherence, depression scale<br>A: regression                 | Resilience and also the ability to take care of yourself are important predictor factors in the handling of stigma cases that occur in PLHIV                                                                                                                                                      |
| (25)  | D: cross sectional study<br>S: 1207 PLHIV<br>V: stigma, resilience<br>I: HIV stigma scale<br>A: multivariate linear regression models                                     | The level of resilience in responding to life problems due to HIV is associated with a decrease in the rate of depression in PLHIV. This will                                                                                                                                                     |

|      |                                                                                                                                                                                                                                                                                                                 |                                                                                                                                                                                                                                                                                          |
|------|-----------------------------------------------------------------------------------------------------------------------------------------------------------------------------------------------------------------------------------------------------------------------------------------------------------------|------------------------------------------------------------------------------------------------------------------------------------------------------------------------------------------------------------------------------------------------------------------------------------------|
|      |                                                                                                                                                                                                                                                                                                                 | support the general level of health in individuals.                                                                                                                                                                                                                                      |
| (26) | D: cross sectional study<br>S: 5059 participants<br>V: stigma and discrimination<br>I: stigma and discrimination towards PLWHA scale<br>A: univariate logistic regression                                                                                                                                       | Openness of status is important in strengthening relations, in Africa it is explained that environmental people have strong support for acceptance so as to minimize the incidence of stigma.                                                                                            |
| (27) | D: qualitative study<br>S: 49 participants<br>V: stigma, HIV<br>I: stigma protocols, hiv self testing<br>A: Qualitative analysis                                                                                                                                                                                | Stigma is rooted in fear, misinformation, shame, legal precaritas and ill-treatment of health that limit the existence of current HIV testing strategies with urban refugee youth.                                                                                                       |
| (28) | D: cross-sectional study<br>S: 239 participants<br>V: Stigma, HIV<br>I: Berger HIV Stigma Scale,<br>A: Multivariable linear regression analysis                                                                                                                                                                 | Stigma stems from individual fears if not accepted by people, misinformation, mistakes and shame, legal precaritas and ill-treatment of health that limit current HIV testing strategies with urban refugee youth.                                                                       |
| (29) | D: cross-sectional study<br>S: 266 HIV-positive<br>V: stigma, depression, coping scale<br>I: Berger HIV stigma scale, Demographics and disease characteristicsm Centers for Epidemiological Studies Depression Scale, The Simplified Coping Skill Questionnaire was<br>A: univariate linear regression analyses | There is a relatively high association of HIV-related stigma among MSM HIV-positive China and identified several risk factors associated with HIV stigma in this population, which can help guide the development of HIV prevention and treatment strategies.                            |
| (30) | D: cross-sectional<br>S: 2,136 participants<br>V: stigma,<br>I: AIDS-related stigma scale<br>A: Bivariate analysis                                                                                                                                                                                              | heterosexual groups that have become the main vector of HIV transmission in France, and who is more likely to mix sexually with the general population. This the results seriously question the hypothesis that HIV-stigma has no effect or may even reduce the spread of HIV infection. |
| (31) | D: cross sectional study<br>S: 626<br>V: stigma, HIV<br>I: PLHIV Stigma Index questionnaire<br>A: Negative binomial                                                                                                                                                                                             | Internal stigma is high among PLHIV and significantly impacts their life decisions and access to their health care. Multi-level interventions are                                                                                                                                        |

|      |                                                                                                                                                 |                                                                                                                                                                   |
|------|-------------------------------------------------------------------------------------------------------------------------------------------------|-------------------------------------------------------------------------------------------------------------------------------------------------------------------|
|      | regression models                                                                                                                               | needed to address the internal stigma experienced by PLHIV.                                                                                                       |
| (32) | D: cross sectional study<br>S: 1,016 participants<br>V: stigma and discrimination<br>I: stigma and discrimination towards PLWH<br>A: Regression | More culturally adapted interventions to reduce overall stigmatization to improve quality of life and plwh health outcomes should be guaranteed to reach 90-90-90 |

## RESULT

Based on the journal analysis that has been conducted, the spread of HIV cases is recorded in various countries both developed and developing countries. The distribution and progressivity of each country shows different numbers and patterns, several countries reveal this incident due to the high number of free-sex cases committed same-sex or different types. In addition, quite a few other cases are the use of drugs and narcotics. From the journal analyse shows that the impacts received by people with HIV /AIDS are very diverse, ranging from short-term or long-term negative impacts during life in the community. In addition to the decrease in health conditions, such as decreased immunity of the body and reduced ability to do activities independently, as well as the emergence of some opportunistic infections that actually aggravate his health condition. On the other hand, the impact is the emergence of new stigma or strengthening of existing stigma and discrimination against PLHIV. This discrimination is directly felt by sufferers such as not accepted in the work environment and family, not involved in social activities and used as a talking point of others. The form of stigma obtained is a negative and bad image of the life of the sufferer before, this is very tangent to the norms and customs imposed in the community.

## DISCUSSION

The results of the study analysis showed that the stigma that occurs in people with HIV (PLHIV) is very diverse, this diversity is influenced by several factors. This personal stigma has a significant association with age, education level, and disclosure of HIV status (28). This is in line with research that has been conducted in China that with age associated with lower stigma scores, this is possible with the views of individuals (33). A change of scenery in much older people due to social support and family support that is better able to adjust and understand the impact and prognosis of the problem of people with HIV (28). The results of the study

showed that the greater the stigma is internalized, the greater the psychological impact felt (34). The reduction of stigma is also influenced by the support of health facilities, by not giving different treatment (35) (17). Family support is one of the key points of strengthening psychological conditions due to stigma and discrimination provided by society.

Factors that affected on stigma in people with HIV is the lack of knowledge and understanding of society related to HIV infection, misinformation by word of mouth will give rise to different perceptions (27). The other research shows that greater knowledge of HIV transmission misconceptions is significantly associated with lower stigma towards people living with HIV. And among urban participants, the level of higher education (high school vs. elementary school or less) (36). Efforts that can be made to prevent stigma in hiv aids groups include pre-clinical education and involving related health institutions (37) (17). Another study suggests that using M-health in India could have important implications for reducing stigma globally (38). Other principles to reduce stigma include building partnerships with institutions that are able to support their health (39). In addition, strengthening the religious aspect can support his health (40). In contrast to self-stigma, self-stigma is giving a negative assessment of oneself due to something that is not accepted or considered inappropriate to others in general. Some efforts that can be made to respond to the stigma of society include by conducting self-testing of HIV but this strategy needs to be implemented as needed (41)(42).

The impact of stigma and discrimination received by PLHIV is very diverse some are not accepted in the community until the rejection of the core family. If the PLHIV does not have a good resilience then he will easily experience mental health. People with mental health problems consistently identify stigma, discrimination and social exclusion as major barriers to their health, well-being, and quality of life. Another impact experienced by the emergence of stigma is the decrease in the disclosure of HIV status in sufferers and the result of inadequate treatment (43) (44).

## CONCLUSION

Stigma and discrimination are complex social problems that can directly affect psychological health conditions. This is exacerbated by a decrease in physical health conditions, such as the emergence of opportunistic infections in PLHIV. This stigma can arise from various parties, such as families, health workers as well as the public at large or who are in PLHIV. Forms of stigma and discrimination vary greatly from exclusion to not being

involved in various community activities. The substantial factor of stigma and discrimination is the lack of knowledge and misinformation related to HIV/AIDS. So the stigma of perceived society and affective, cognitive, and mental health outcomes (self-esteem, depressive symptoms, avoiding coping, self-blame) need to be anticipated with a holistic family approach as well as good social support.

## REFERENCES

1. World Health Organization. HIV/AIDS [Internet]. 2020. Available from: <https://www.who.int/news-room/fact-sheets/detail/hiv-aids>
2. Centers for Disease Control and Prevention. Estimated HIV Incidence and Prevalence in the United States. 2016;24(1).
3. Shokoohi M, Bauer GR, Kaida A, Logie CH, Lacombe- A, Milloy M, et al. Patterns of social determinants of health associated with drug use among women living with HIV in Canada: a latent class analysis analysis. *Addiction*. 2020;114(7):1214–24.
4. Aidala AA, Wilson MG, Shubert V, Gogolishvili D, Globerman J, Rueda S, et al. Housing status, medical care, and health outcomes among people living with HIV/AIDS: A systematic review. *Am J Public Health*. 2016;106(1):e1–23.
5. Dereje N, Moges K, Nigatu Y, Holland R. Prevalence and predictors of opportunistic infections among HIV positive adults on antiretroviral therapy (On-art) versus pre-art in addis ababa, Ethiopia: A comparative cross-sectional study. *HIV/AIDS - Res Palliat Care*. 2019;11:229–37.
6. M. R. Disparities in the magnitude of human immunodeficiency virus-related opportunistic infections between high and low/ middle-income countries: is highly active antiretroviral therapy changing the trend? *Ann. Med Heal Sci Res*. 2016;6(1):4.
7. Centers for Disease Control and Prevention. How many people receive an HIV diagnosis each year in the United States and 6 dependent areas? CDC. 2021.
8. HIV.Gov. The Global HIV/AIDS Epidemic. 2020;
9. Global information and education on HIV AIDS. GLOBAL HIV AND AIDS STATISTICS [Internet]. 2020. Available from: <https://www.avert.org/global-hiv-and-aids-statistics>
10. UNAIDS. Confronting Discrimination: Overcoming HIV-related Stigma and Discrimination in Health-care Settings and Beyond. 2017;
11. Hatzenbuehler ML, Phelan JC LB. Stigma as a fundamental cause of population health inequalities. *Am J Public Heal*. 2015;103(5).
12. Catona D, Greene K, Magsamen-Conrad K CA. Perceived and experienced stigma among people living with HIV: examining the role of prior stigmatization on reasons for and against future disclosures. *J Appl Commun Res*. 2016;44.
13. Ojikutu BO, Pathak S, Srithanaviboonchai K, Limbada M, Friedman R, Li S et al. Community cultural norms, stigma and disclosure to sexual partners among women

living with HIV in Thailand, Brazil and Zambia (HPTN 063). *PLoS One*. 2016;11.

14. Kane JC, Elafros MA, Murray SM, Mitchell EMH, Augustinavicius JL, Causevic S, et al. A scoping review of health-related stigma outcomes for high-burden diseases in low- and middle-income countries. *BMC Med*. 2019;17(1).
15. Jackson-Best F, Edwards N. Stigma and intersectionality: A systematic review of systematic reviews across HIV/AIDS, mental illness, and physical disability. *BMC Public Health*. 2018;18(1):1–19.
16. Green D, Tordoff DM, Kharono B, Akullian A, Morrison M, Garnett G, et al. Evidence of sociodemographic heterogeneity across the HIV treatment cascade and progress towards 90 - 90 - 90 in sub - Saharan Africa – a systematic review and meta - analysis. 2020;1–12.
17. Nyblade L, Srinivasan K, Raj T, Oga EA, Heylen E, Mazur A, et al. HIV Transmission Worry Predicts Discrimination Intentions Among Nursing Students and Ward Staff in India. *AIDS Behav*. 2021;25(2):389-396.
18. Wu D, Ong JJ, Tang W, Ritchwood TD, Walker JS, Iwelunmor J, et al. Crowdsourcing Methods to Enhance HIV and Sexual Health Services: A Scoping Review and Qualitative Synthesis. *J Acquir Immune Defic Syndr*. 2019;82(December):S271–8.
19. Hargreaves JR, Pliakas T, Hoddinott G, Mainga T, Mubekapi-Musadaidzwa C, Donnell D, et al. HIV Stigma and Viral Suppression Among People Living With HIV in the Context of Universal Test and Treat: Analysis of Data From the HPTN 071 (PopART) Trial in Zambia and South Africa. *J Acquir Immune Defic Syndr*. 2020;85(5):561–70.
20. Yigit I, Bayramoglu Y, Weiser, Sheri D Johnson MO, Mugavero MJ, Turan JM, Turan B. Disclosure Concerns and Viral Suppression in People Newly Initiating HIV Care. *JAIDS J Acquir Immune Defic Syndr*. 2021;86(4):406–12.
21. Friedland BA, Gottert A, Hows J, Baral SD, Sprague L, Nyblade L, et al. The People Living with HIV Stigma Index 2.0: generating critical evidence for change worldwide. *AIDS*. 2020;34(January):S5–18.
22. Lam A, Mayo NE, Scott S, Brouillette, Marie-Josée, Fellows LK. HIV-Related Stigma Affects Cognition in Older Men Living With HIV, *JAIDS Journal of Acquired Immune Deficiency Syndromes*: February 1., *JAIDS J Acquir Immune Defic Syndr*. 2019;80(2):198–204.
23. Shrestha R, Altice FL, Copenhaver MM. HIV-Related stigma, motivation to adhere to antiretroviral therapy, and medication adherence among HIV-positive methadone-maintained patients. *J Acquir Immune Defic Syndr*. 2019;80(2):166–73.
24. Turan B, Crockett KB, Buyukcan-Tetik A, Kempf MC, Konkole-Parker D, Wilson TE, et al. Buffering Internalization of HIV Stigma: Implications for Treatment Adherence and Depression. *J Acquir Immune Defic Syndr*. 2019;80(3):284–91.
25. Gottert A, Friedland B, Geibel S, Nyblade L, Baral SD, Kentutsi S, et al. The People Living with HIV (PLHIV) Resilience Scale: Development and Validation in Three Countries in the Context of the PLHIV Stigma Index. *AIDS Behav* [Internet]. 2019;23(s2):172–82. Available from: <https://doi.org/10.1007/s10461-019-02594-6>
26. Schafer MH, Upenieks L, DeMaria J. Do Older Adults with HIV Have Distinctive

Personal Networks? Stigma, Network Activation, and the Role of Disclosure in South Africa. *AIDS Behav* [Internet]. 2020;(0123456789). Available from: <https://doi.org/10.1007/s10461-020-02996-x>

27. Logie CH, Okumu M, Musoke DK, Hakiza R, Mwima S, Kyambadde P, et al. Intersecting stigma and HIV testing practices among urban refugee adolescents and youth in Kampala , Uganda : qualitative findings. 2021;
28. Li Z, Morano JP, Khoshnood K, Hsieh E, Sheng Y. HIV-related stigma among people living with HIV/AIDS in rural Central China. *BMC Health Serv Res*. 2018 Jun;18(1):453.
29. Li Z, Hsieh E, Morano JP, Sheng Y. Exploring HIV-related stigma among HIV-infected men who have sex with men in Beijing , China : a correlation study. 2016;0121(May).
30. Peretti-watel P, Spire B, Obadia Y, Moatti J, Group V. Discrimination against HIV-Infected People and the Spread of HIV : Some Evidence from France. 2007;(5).
31. Moussa A Ben, Delabre RM, Villes V, Elkhammas M, Bennani A, Ouarsas L, et al. Determinants and effects or consequences of internal HIV-related stigma among people living with HIV in Morocco. 2021;1–11.
32. Tran BX, Quoc P, Than T, Tran TT, Nguyen CT, Latkin CA. Changing Sources of Stigma against Patients with HIV / AIDS in the Rapid Expansion of Antiretroviral Treatment Services in Vietnam. 2019;2019.
33. Huang W, Cai J, Shi W ZY. Perceived stigma among 144 patients with HIV/AIDS. *Mod Prev Med*. 2016;43(6):1127–1129.
34. Brener L, Broady T, Cama E, Hopwood M, de Wit JBF, Treloar C. The role of social support in moderating the relationship between HIV centrality, internalised stigma and psychological distress for people living with HIV. *AIDS Care*. 2019;32(7):850–7.
35. Nyblade L, Stockton MA, Giger K, Bond V, Ekstrand ML, Lean RM, et al. Stigma in health facilities: Why it matters and how we can change it. *BMC Med*. 2019;17(1):1–15.
36. Li X, Yuan L, Li X, Shi J, Jiang L, Zhang C, Yang X, Zhang Y, Zhao D ZY. Factors associated with stigma attitude towards people living with HIV among general individuals in Heilongjiang, Northeast China. *BMC Infect Dis*. 2017;17(1):154.
37. Waluyo A, Mansyur M, Earnshaw VA, Steffen A, Herawati T, Maria R, et al. Exploring HIV stigma among future healthcare providers in Indonesia. *AIDS Care*. 2021;
38. Ekstrand ML, Raj T, Heylen E, Nyblade L, Devdass D, Pereira M, et al. Reducing HIV stigma among healthcare providers in India using a partly tablet-administered intervention: the DriSti trial. *AIDS Care*. 2020;32:11–4.
39. Nyblade L, Mingkwan P, Stockton MA. Stigma reduction: an essential ingredient to ending AIDS by 2030. *Lancet HIV* [Internet]. 2021;8(2):106–13. Available from: [https://www.thelancet.com/journals/lanhiv/article/PIIS2352-3018\(20\)30309-X/fulltext](https://www.thelancet.com/journals/lanhiv/article/PIIS2352-3018(20)30309-X/fulltext)
40. Lipira L, Williams EC, Nevin PE, Kemp CG, Cohn SE, Turan JM, et al. Religiosity, Social Support, and Ethnic Identity: Exploring “resilience Resources” for African-

American Women Experiencing HIV-Related Stigma. *J Acquir Immune Defic Syndr*. 2019;81(2):175–83.

41. Peitzmeier SM, Grosso A, Bowes A, Ceesay N, Baral SD. Associations of Stigma With Negative Health Outcomes for People Living With HIV in the Gambia : Implications for Key Populations. 2015;68:146–53.
42. Logie CH, Okumu M, Mwima S, Hakiza R, Irungi KP, Kyambadde P et al. Social ecological factors associated with experiencing violence among urban refugee and displaced adolescent girls and young women in informal settlements in Kampala, Uganda: a cross-sectional study. *Confl Heal*. 2019;13(1):1–15.
43. Perlo J, Colocci I, Rajagopal SS, Betancourt TS, Pradeep A, Mayer KH, et al. The Convergence of Disclosure Concerns and Poverty Contributes to Loss to HIV Care in India: A Qualitative Study. *J Int Assoc Provid AIDS Care* [Internet]. 2020;19. Available from: <https://journals.sagepub.com/doi/10.1177/2325958220934606>
44. Christopoulos KA, Neilands TB, Hartogensis W, Geng EH, Saucedo J, Mugavero MJ, et al. Internalized HIV Stigma Is Associated with Concurrent Viremia and Poor Retention in a Cohort of US Patients in HIV Care. *J Acquir Immune Defic Syndr*. 2019;82(2):116–23.

# Stigma and Discrimination on People Living with HIV (PLHIV): a Systematic Review

## ORIGINALITY REPORT

14%

SIMILARITY INDEX

14%

INTERNET SOURCES

13%

PUBLICATIONS

0%

STUDENT PAPERS

## PRIMARY SOURCES

|   |                                                                                                             |    |
|---|-------------------------------------------------------------------------------------------------------------|----|
| 1 | <a href="http://worldwidescience.org">worldwidescience.org</a><br>Internet Source                           | 2% |
| 2 | <a href="http://www.avert.org">www.avert.org</a><br>Internet Source                                         | 2% |
| 3 | <a href="http://bmcmmedicine.biomedcentral.com">bmcmmedicine.biomedcentral.com</a><br>Internet Source       | 2% |
| 4 | <a href="http://bmcpublichealth.biomedcentral.com">bmcpublichealth.biomedcentral.com</a><br>Internet Source | 2% |
| 5 | <a href="http://www.tandfonline.com">www.tandfonline.com</a><br>Internet Source                             | 1% |
| 6 | <a href="http://journals.lww.com">journals.lww.com</a><br>Internet Source                                   | 1% |
| 7 | <a href="http://link.springer.com">link.springer.com</a><br>Internet Source                                 | 1% |
| 8 | <a href="http://www.coursehero.com">www.coursehero.com</a><br>Internet Source                               | 1% |
| 9 | <a href="http://www.hindawi.com">www.hindawi.com</a><br>Internet Source                                     | 1% |

10

[www.unboundmedicine.com](http://www.unboundmedicine.com)

Internet Source

1 %

11

[duizenden-legjobban.com](http://duizenden-legjobban.com)

Internet Source

<1 %

12

[journals.plos.org](http://journals.plos.org)

Internet Source

<1 %

13

[journals.sagepub.com](http://journals.sagepub.com)

Internet Source

<1 %

Exclude quotes Off

Exclude matches < 10 words

Exclude bibliography On
